# Supplementary material for: A polymer supported Cu(i) catalyst for the ‘click reaction’ in aqueous media
Source: Royal Society of Chemistry journal article supplement (doi:10.1039/c4dt02962c), 2014-11-19
Supplement: c4dt02962c1.pdf [file c4dt02962c1.pdf]

### Polymer supported Cu(I) catalyst for 'click reaction' in aqueous media

Rafique Ul Islam,<sup>a</sup> Abu Taher,<sup>a</sup> Meenakshi Choudhary,<sup>a</sup> Michael J Witcomb,<sup>b</sup> Kaushik Mallick<sup>a\*</sup>

<sup>a</sup> Department of Chemistry, University of Johannesburg, P.O. Box 524, Auckland Park 2006, South Africa,

<sup>b</sup> DST/NRF Centre of Excellence in Strong Materials, University of the Witwatersrand, Private Bag 3, WITS 2050, South Africa.

\* Address correspondence to [kaushikm@uj.ac.za](mailto:kaushikm@uj.ac.za)

**Fig. S1.** EDX spectra of Cu(I)-*p*ABA

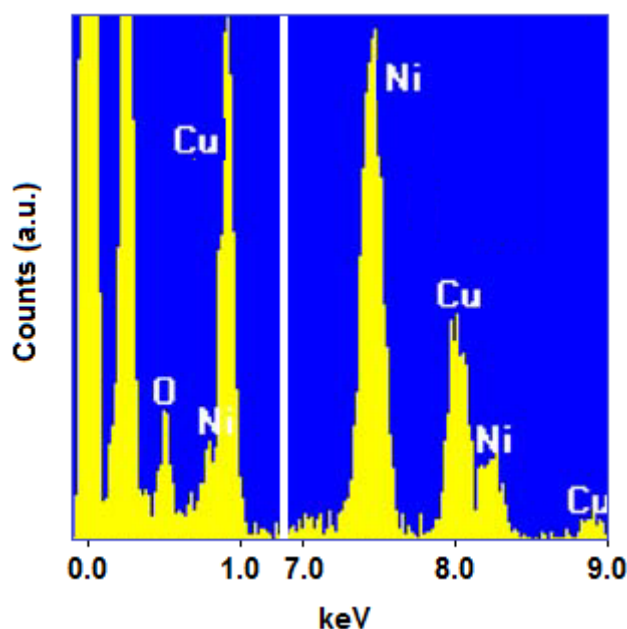

**Fig. S2.** P-XRD pattern of Cu(I)-*p*ABA

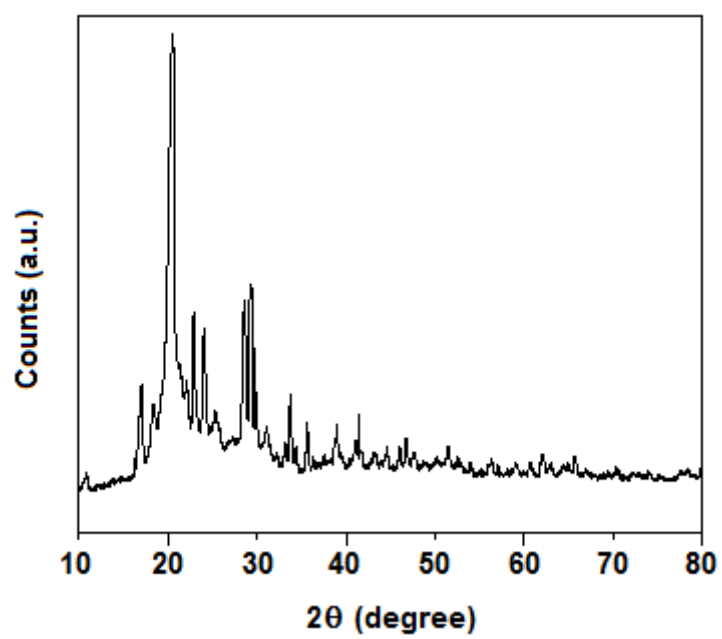

**Fig. S3.** DSC thermogram of *p*ABA (A) and Cu(I)-*p*ABA (B)

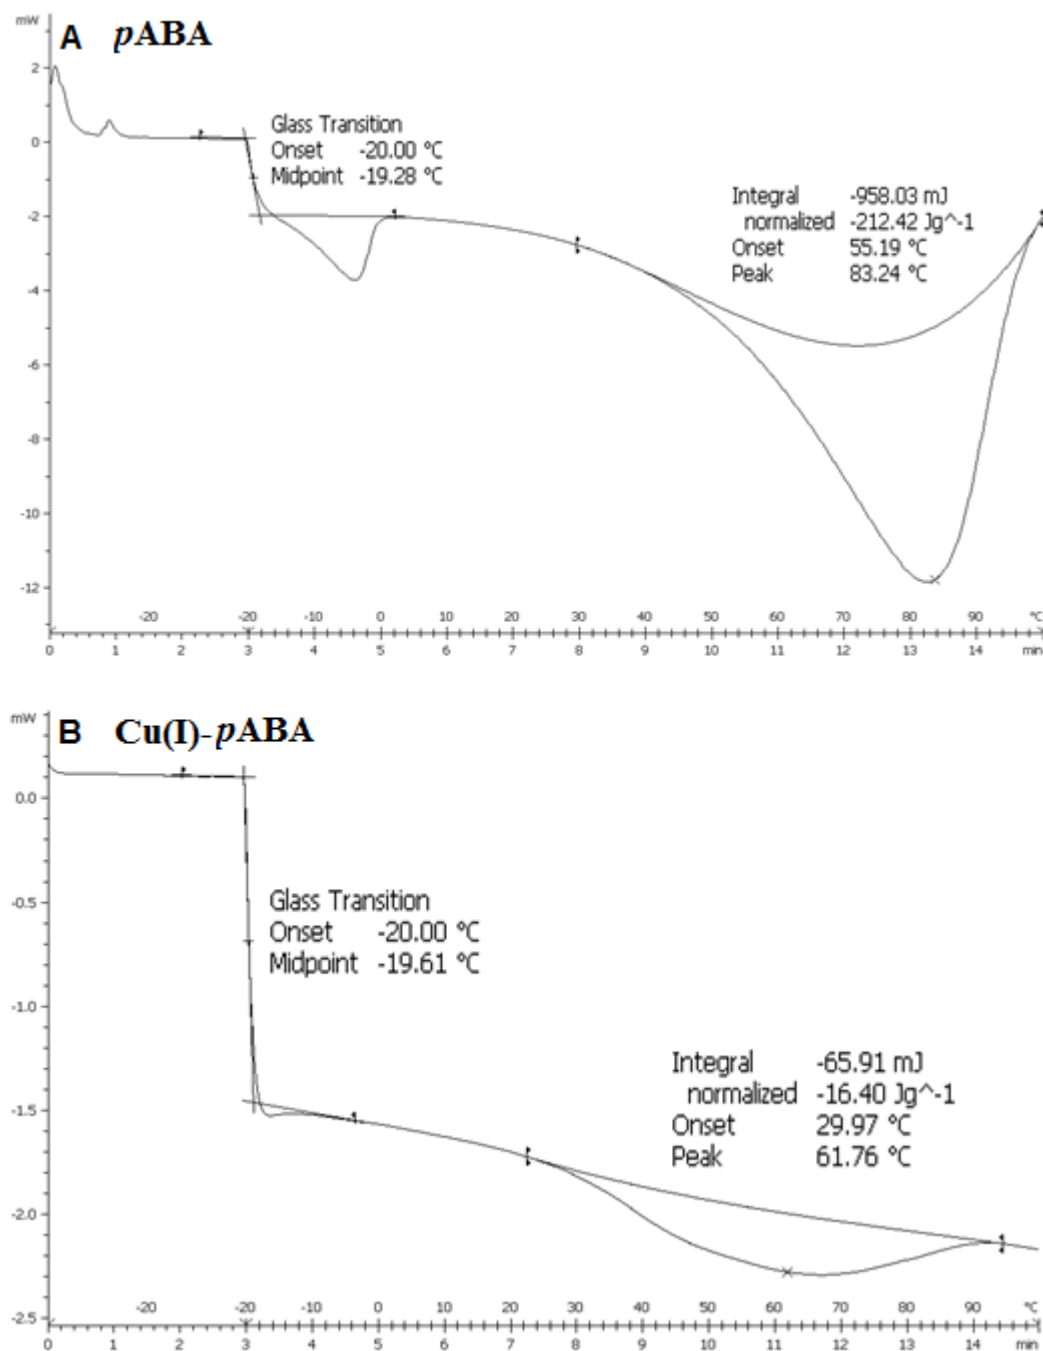

Differential scanning calorimetry (DSC) studies were carried out for the *p*ABA (A) and the Cu(I)-*p*ABA (B) samples maintaining a thermal scan from -20 °C (253.15 K) to +100 °C (373.15 K) in air with a Mettler-Toledo DSC 822 instrument (Fig. S3).

There are two thermal events evident for both the samples. The first event is indicative of a glass transition at  $-19.28\text{ }^{\circ}\text{C}$  (253.87 K) and  $-19.61\text{ }^{\circ}\text{C}$  (253.54 K) and the second event is indicative of a softening/melting point at  $83.24\text{ }^{\circ}\text{C}$  (356.39 K) and  $61.76\text{ }^{\circ}\text{C}$  (334.91 K) for *p*ABA and the Cu(I)-*p*ABA respectively. From the DSC thermogram it is clear that the presence of copper reduces the degree of polymer softening process in Cu(I)-*p*ABA sample.
